# Supplementary material
Source: PubMed Central journal article supplement (PMC5121058)
Supplement: NIHMS817466-supplement-Supplemental_Digital_Content.pdf [file NIHMS817466-supplement-Supplemental_Digital_Content.pdf]

## **Appendix 1. Miscarriage Management Choice Study Qualitative Interview Script – Patient**

1. Could you tell me a little about your pregnancy history?
  - a. Have you been pregnant before? (If yes,) How did that go? (If previous miscarriage) What did you take away from the experience? How did it factor into your decision making process this time?
2. How did you feel going into this pregnancy?
3. What has your support been like so far?

### **Beginning of Miscarriage and Presentation to Care**

4. How did you find out you had a miscarriage?
5. What prompted you to come in?
6. What did you think was happening at that point?

### **Receiving Counseling and Options Offered**

Let's talk about your first conversation with a medical provider about your miscarriage or pregnancy loss.

7. Did the medical staff offer you options to finish/conclude your miscarriage process? (yes/no)
  - a. What options were offered?
  - b. What thoughts were going through your head as these options were described to you? OR What stood out to you about the options?
8. If so, which options appealed to you the most?
9. What was appealing about this/these options? (make sure to probe about each one they felt made any sense to them to understand all the elements that they like)
10. Were there any options that you knew weren't right for you? What about that/those options turned you off?
11. What questions did you have?
12. What parts of the conversation were helpful to you in making a decision?
13. What was it like to talk to your provider about the miscarriage?
14. How comfortable did you feel with the decision-making process?

### **Provider Preferences**

15. If at all, what role did your provider's opinion/perspective play in your decision-making process?

### **Personal Factors**

16. Who are some people outside of your medical team that influenced your decision? (prompt: family member, friend, significant other)
  - a. Tell me about how that person/those people influenced your decision.

Schreiber CA, Chavez V, Whittaker PG, Ratcliffe SJ, Ealey E, and Barg FK. Treatment decisions at the time of miscarriage diagnosis. *Obstet Gynecol* 2016; 128.

The authors provided this information as a supplement to their article.

- b. Tell me a bit about your relationship status. . .and whether this relationship or this person affected your decision (If not clear, you might ask explicitly) What is your relationship with the father?
17. What other factors did you consider? (prompt: religion, politics, past experience, major life changes)
- a. How did x factor influence your decision (ask for each factor mentioned)?

### **Making the Decision**

18. Tell me about how easy or hard it was to make up your mind? How did you choose, ultimately? How, if at all, did the appeal of each option change as you considered things?
19. Did a past pregnancy influence your decision this time? How so?
20. What are the most important things that you considered when making a decision?
21. Thinking about the discussion(s) you had with your provider (or anyone else you discussed the decision with), tell me about the things that were mentioned that were least important to you.

### **Receiving Treatment**

22. What treatment did you receive?

### **After Treatment – Satisfaction**

23. How would you describe your treatment experience?
- a. In what ways did you feel your medical needs were addressed by the medical team?
  - b. Were all your questions addressed?
  - c. In what ways were your emotional needs met or not?
  - d. What might have improved your experience?
24. Tell me about the transition back into your daily routine.
25. If you have a miscarriage in the future, do you think you would choose this same treatment again?
26. How would you advise a friend who is having a miscarriage?
27. Would you like to add anything else about your miscarriage management experience that you think is important for us to know at this time?

## **Appendix 2. Miscarriage Management Choice Study Qualitative Interview Script – Health Care Provider**

### **Providing Counseling**

1. Do you offer options to your patients for miscarriage management/ EPL? How do you go about do this?

### **Provider Preferences**

2. What role do you think your opinion/perspective plays in the decision-making process?

### **External Influences**

3. What are some external factors that have an influence on the decision-making process for your patients? (prompt: family member, friend, significant other, religion, politics)

### **Making the Decision**

4. To what degree do you and/or your patient contribute to the final decision?
5. What are the most important things you and/or your patient consider when making a decision
